# Supplementary material
Source: publisher site journal article supplement (http://www.degruyter.com/publication/journal_key/NPF/downloadAsset/NPF_NPF%20General%20Call%20for%20Papers.pdf)
Supplement: Supplementary file 1 [file NPF_NPF%20General%20Call%20for%20Papers.pdf]

## Call for Papers

The Nonprofit Policy Forum is pleased to welcome the submission of unsolicited manuscripts year-round. NPF publishes original, high-quality research and analysis from all scholarly disciplines and all parts of the world that address important public policy issues affecting nonprofits, philanthropy, and social enterprise. A double-blind peer review process is used to select papers for publication.

NPF is published quarterly by De Gruyter, Inc. in open access format and is fully available at [www.degruyter.com/loi/npf](http://www.degruyter.com/loi/npf) Open access is made possible by NPF's generous institutional sponsors: the [Humphrey School of Public Affairs](#), University of Minnesota; the [Urban Institute](#); the [Jack, Joseph and Morton Mandel School of Applied Social Sciences](#), Case Western Reserve University; [Association for Research on Nonprofit Organizations and Voluntary Action \(ARNOVA\)](#); and the [Schar School of Policy and Government](#), George Mason University . NPF's editorial board consists of leading scholars from 20 different countries in Europe, Asia, North America, and Australia. The journal is indexed in Scopus and the Emerging Science Citation Index (ESCI) and is searchable in the Web of Science Core Collection.

Articles published in NPF address a broad range of nonprofit public policy issues. Subject areas include but are not limited to: government funding, tax, and regulatory policies related to nonprofits and philanthropy; nonprofit advocacy and lobbying; other aspects of nonprofit-government relations; social enterprise and sector boundary issues; global/cross-national NGO issues; and developments in policy fields such as health care, social justice, the environment, education, and the arts that affect nonprofits.

NPF invites research papers of 5,000-8,000 words as well as shorter special features such as policy briefs, research notes, commentaries, case studies, interviews, and book reviews. Proposals for special issues are also welcome. More detail on how to submit manuscripts to NPF is available on NPF's website, <https://www.degruyter.com/journal/key/NPF/html>
